# Supplementary material for: Electronic structure modulation of Mo sites in anion and cation co-doped MoO2 nanospheres for electrocatalytic water oxidation
Source: Royal Society of Chemistry journal article supplement (doi:10.1039/d3cc06039j), 2024-01-01
Supplement: d3cc06039j1.pdf [file d3cc06039j1.pdf]

**Electronic Supplementary Information for**

**Electronic structure modulation of Mo sites in anion and cation co-doped MoO<sub>2</sub>  
nanospheres for electrocatalytic water oxidation**

Chunyan Zhang, ‡ Ling Wang, ‡ Zhuwei Cao, Rui Li, Sheng Ye\*

School of Materials and Chemistry & School of Plant Protection, Anhui Agricultural  
University, Hefei 230036, China

**\*Corresponding author**

E-mail: sye503@ahau.edu.cn

‡ These authors contributed equally to this work: Chunyan Zhang and Ling Wang.

## **Experimental**

### **Material**

$(\text{NH}_4)_6\text{Mo}_7\text{O}_{24}\cdot 4\text{H}_2\text{O}$  was purchased from Sinopharm Chemical Reagent Co., Ltd. Both  $\text{NaBH}_4$  and  $\text{HCl}$  were from Macklin Co., Ltd.  $\text{Ni}(\text{NO}_3)_2\cdot 6\text{H}_2\text{O}$  was provided by Aladdin Co., Ltd. The water used in the experiments was purified by a Millipore system. All purchased reagents can be used directly without further purification.

### **Synthesis of $\text{MoO}_2$ nanospheres**

Firstly,  $\text{MoO}_2$  were synthesized by hydrothermal method. Specifically, slowly drop aqueous solution with 15 mmol sodium borohydride dissolved in 50 ml distilled water into a solution containing 1 mmol of ammonium molybdate and 300 ml of distilled water under magnetic stirring. After 10 min, the pH value of above solution was adjusted to 5 by using concentrated 37%  $\text{HCl}$ . And the mixed solution was strongly stirred at room temperature for 3 h. The brown black solution was transferred to a 500 mL polytetrafluoroethylene lined autoclave and held at 220 °C for 20 h. After centrifugation, the resulted samples were obtained by washing with 95% ethanol and drying at room temperature.

### **Synthesis of $\text{Ni-MoO}_2$ , $\text{N-MoO}_2$ and $\text{Ni/N-MoO}_2$ nanospheres**

The synthesis methods of the three kinds of samples were similar to those of  $\text{MoO}_2$ .  $\text{Ni-MoO}_2$  was prepared by adding 2 wt %  $\text{Ni}(\text{NO}_3)_2\cdot 6\text{H}_2\text{O}$  in the preparation process. For comparison, samples were fabricated by the same procedure with different percentages of  $\text{Ni}(\text{NO}_3)_2\cdot 6\text{H}_2\text{O}$ . While  $\text{N-MoO}_2$  and  $\text{Ni/N-MoO}_2$  composites were synthesized by calcining the bulk  $\text{MoO}_2$  and  $\text{Ni-MoO}_2$  composites respectively at 450 °C for 30 min

and 150 min under  $\text{NH}_3$  atmosphere at a heating speed of  $2\text{ }^\circ\text{C min}^{-1}$ . For comparison, samples were fabricated by the same procedure with different calcining time.

### **Characterizations**

Field emission scanning electron microscope (SEM, Hitachi S4800) and transmission electron microscope (TEM, Tecnai G2 F20) were used to characterize the morphology and structural information of the prepared samples. The high-resolution transmission electron microscope (HRTEM, JEM-2100 plus) image was tested on the transmission electron microscope. Fourier transform infrared spectroscopy (FTIR, Nicolet iS 10) was recorded on the Brooke tensor II Fourier transform infrared spectrometer. The powder X-ray diffraction (XRD, X' Pert PRO MPD) analysis of the composite was carried out using Rigaku D/Max 2500 PC diffractometer (test range:  $10\text{-}80^\circ$ , working voltage: 40 V, working current: 20 mA). Thermo Science 250Xi system was used for X-ray photoelectron spectroscopy (XPS, Thermo Kalpha) measurement with monochromatic  $\text{Al K}\alpha$  as the excitation source, the binding energy was calibrated with reference to the  $\text{C1S}$  peak of 284.8 eV.

### **Electrochemical measurements**

In 1.0 M KOH electrolyte, all electrochemical measurements of OER activity of the prepared materials were performed using an electrochemical workstation (CHI 760E, CH Instruments Ins., Shanghai, China). Using the standard three electrode system, prepared the catalyst into a  $2\text{ mg mL}^{-1}$  solution, in which the volume ratio of water, ethanol and 5 wt% Nafion solution is 8:1:1. Then, dripped it to foam nickel ( $0.5 \times 0.5\text{ cm}^2$ ) as the working electrode, silver/silver chloride electrode as the reference electrode,

and platinum plate as the counter electrode. The relationship between all measured potentials and the reversible hydrogen electrode (RHE) is reported according to the following equation:  $E_{(RHE)} = E_{(AgCl/Ag)} + (0.24 + 0.059 \text{ pH}) \text{ V}$ .

In 1.0 M KOH electrolyte solution, all linear sweep voltammetry curves (LSV) were measured at a scanning rate of  $5 \text{ mV s}^{-1}$  within the RHE range of 0.1-0.3 V. According to the formula ( $\eta = a + b \log(\text{abs}(j))$ ) to calculate the Tafel curve (b: Tafel slope, j: current density). The electrochemical impedance spectroscopy (EIS) measurement was carried out under the condition that RHE was 1.57 V, frequency was from 0.1 Hz to  $1 \times 10^6$  Hz. The closed cycle voltammetry (CV) curves at different scanning rates were measured to study the double-layer capacitance ( $C_{dl}$ ).

### **DFT calculations**

The DFT results were obtained plane wave basis sets, periodic boundary conditions of CASTEP. The configurations of the systems were optimized by fully relaxing the atomic structures until the remaining forces were less than  $0.01 \text{ eV/\AA}$ . A cutoff energy of 600 eV was used for the GGA-PBE and plane wave basis in all relaxation processes. For self-consistent field (SCF) calculations, the convergence criteria for total energy and electron density were set to  $1 \times 10^{-6}$  au. To model the (-111) plane of  $\text{MoO}_2$ . To match the lattice parameters. To avoid interactions with neighboring atomic layers, a vacuum region of  $15 \text{ \AA}$  was set along the z direction, which had no effect on the total energy. The Brillouin zone sampling was set to  $2 \times 2 \times 1$  k-points. During the optimization of the configurations, the atomic structures were fully relaxed until the remaining forces were less than  $0.01 \text{ eV/\AA}$ . To improve accuracy. According to the

literature description, the absorption energy of the free energy change ( $\Delta G_H$ ) was calculated and used to observe catalytic activity.

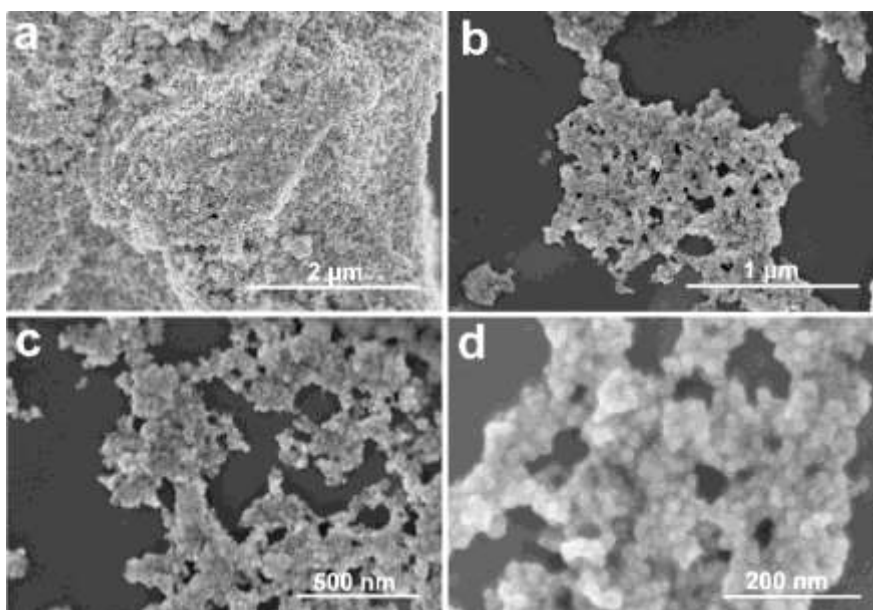

**Fig. S1** SEM images of MoO<sub>2</sub>.

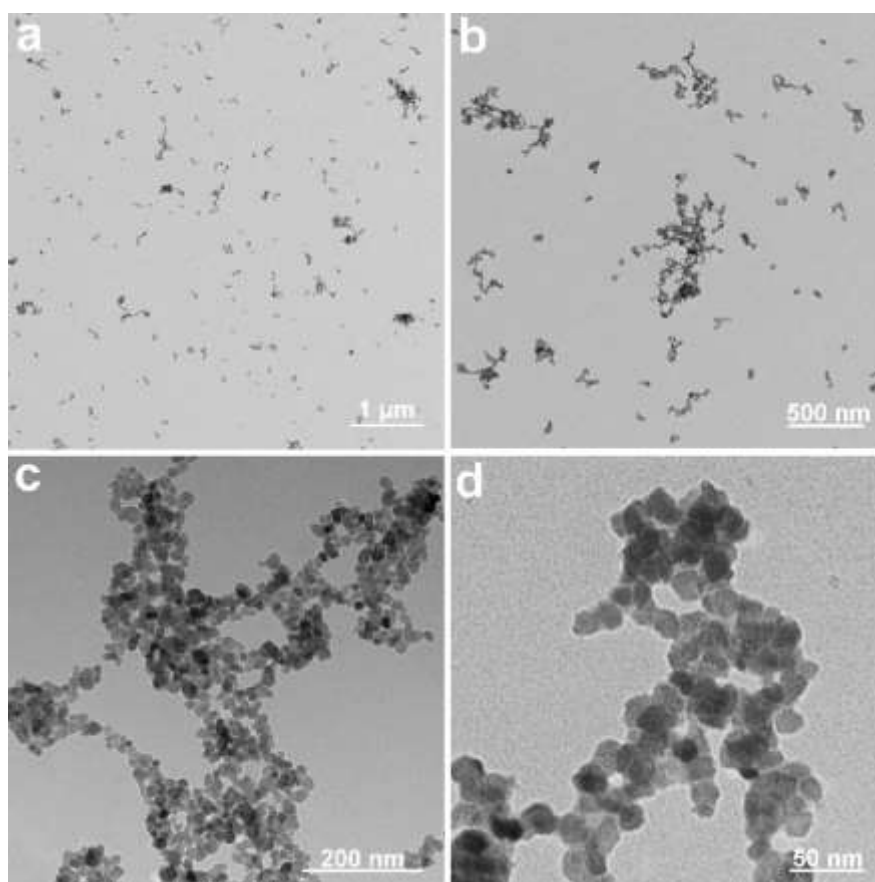

**Fig. S2** TEM images of MoO<sub>2</sub>.

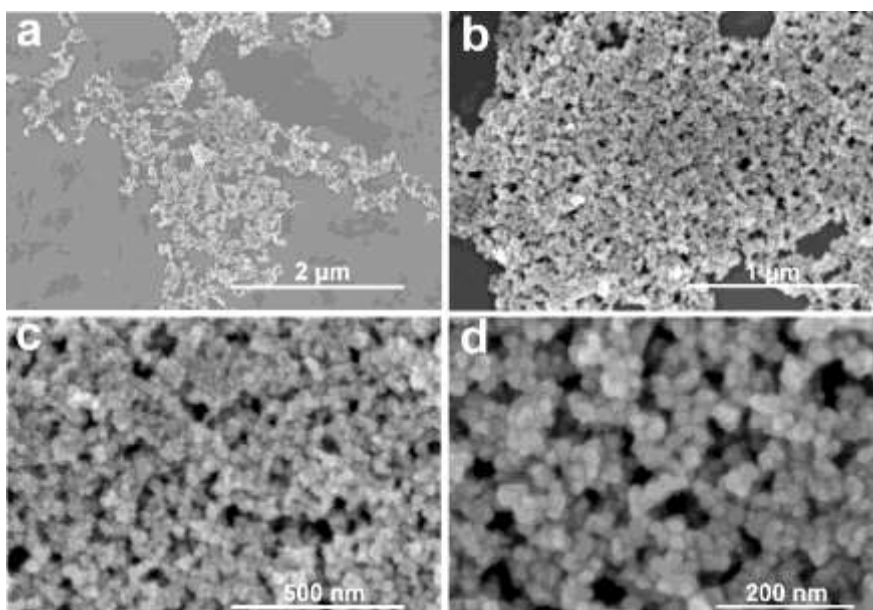

**Fig. S3** SEM images of Ni-MoO<sub>2</sub>.

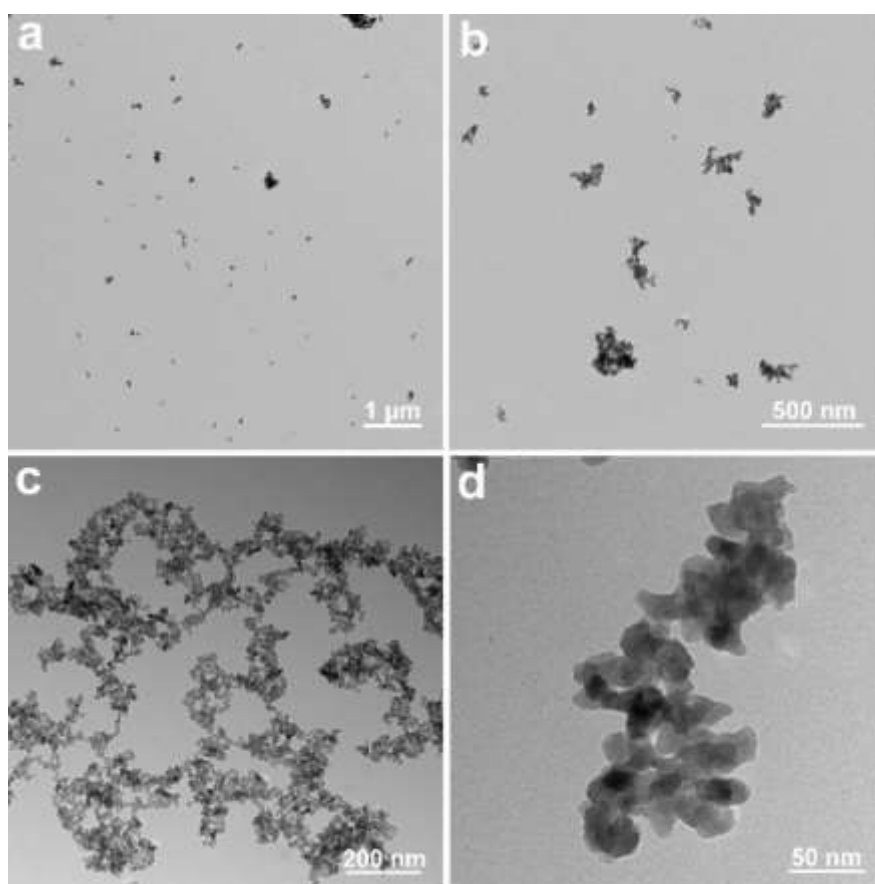

**Fig. S4** TEM images of Ni-MoO<sub>2</sub>.

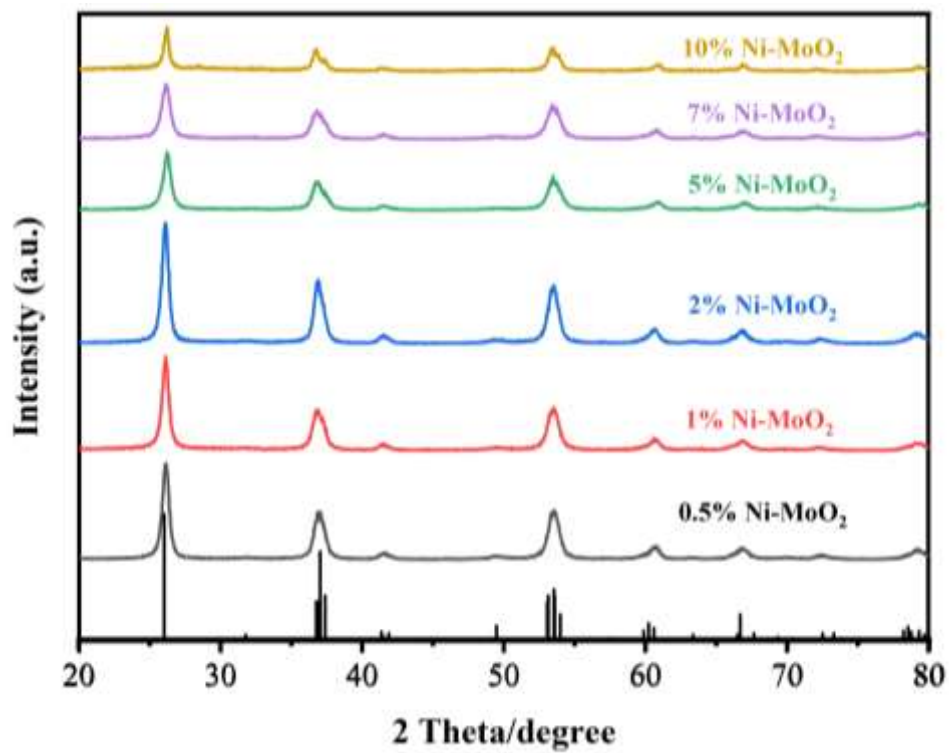

**Fig. S5** XRD patterns of the as-prepared Ni-MoO<sub>2</sub> catalysts with different configurations.



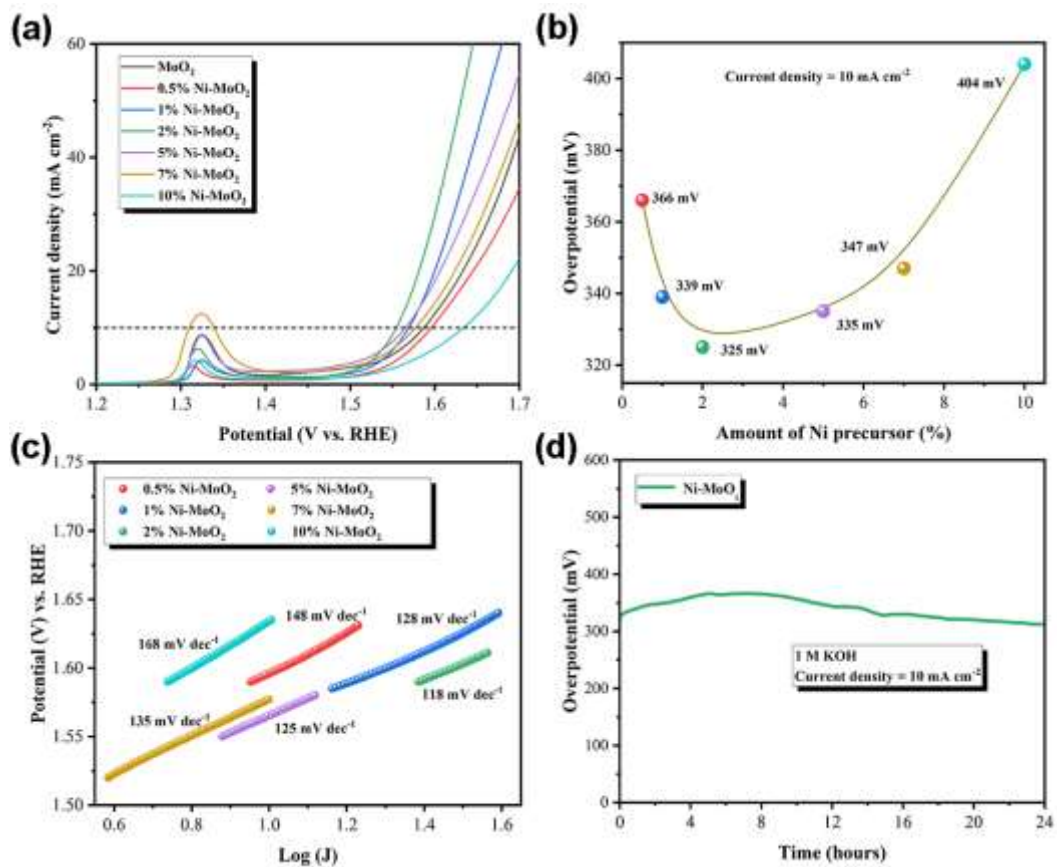

**Fig. S6** (a) Polarization curves. (b) Overpotential comparison diagram at  $10 \text{ mA cm}^{-2}$ . (c) Tafel slopes of the as-prepared Ni- $\text{MoO}_3$  catalysts with different configurations. (d) Chronopotentiometric responses of Ni- $\text{MoO}_3$  at the current density of  $10 \text{ mA cm}^{-2}$ .

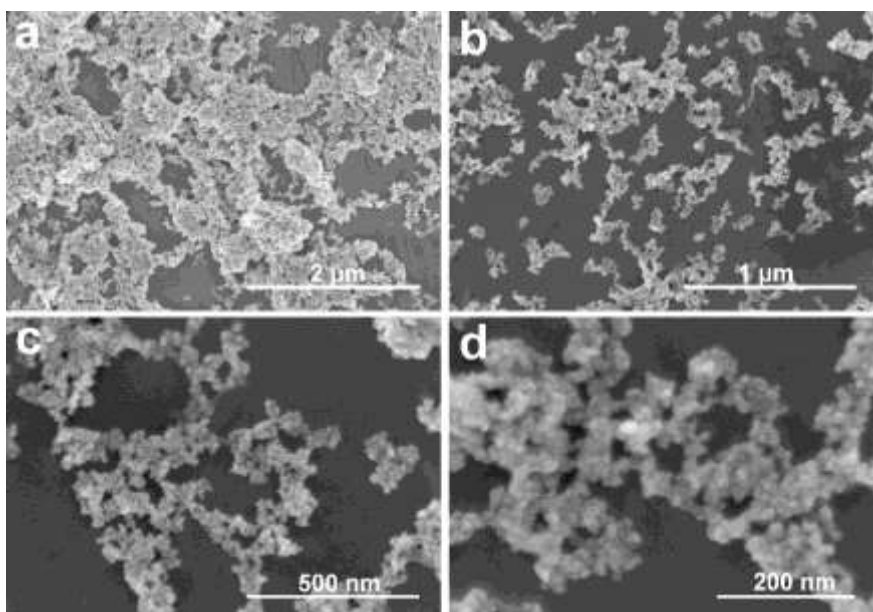

**Fig. S7** SEM images of N-MoO<sub>2</sub>.

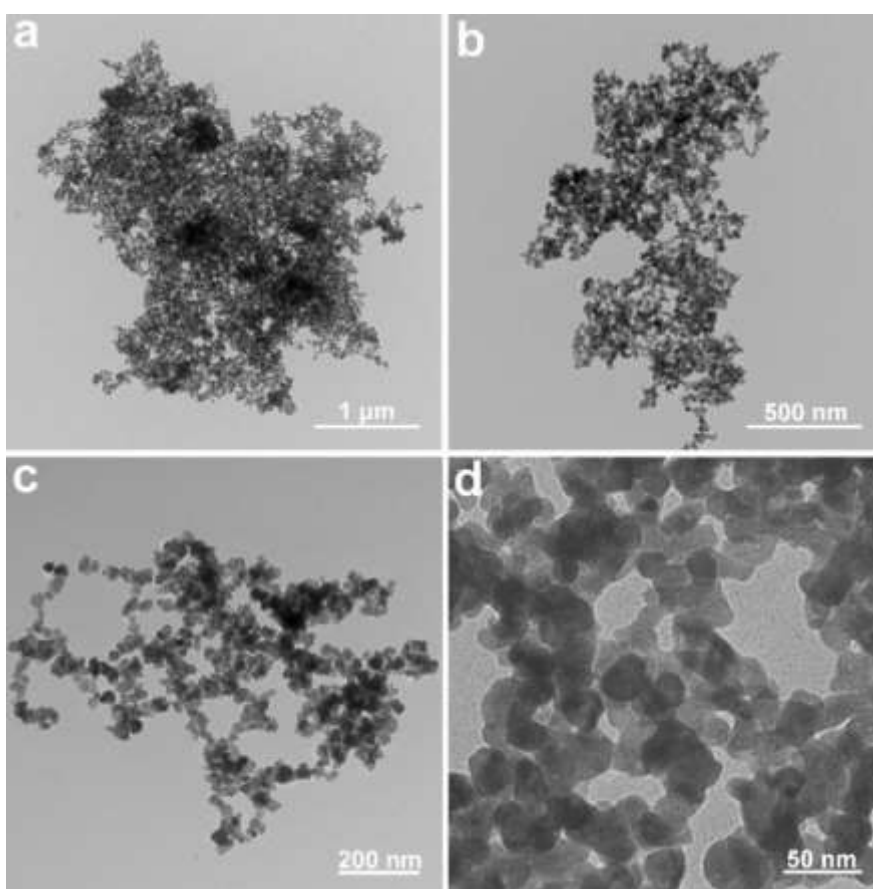

**Fig. S8** TEM images of N-MoO<sub>2</sub>.

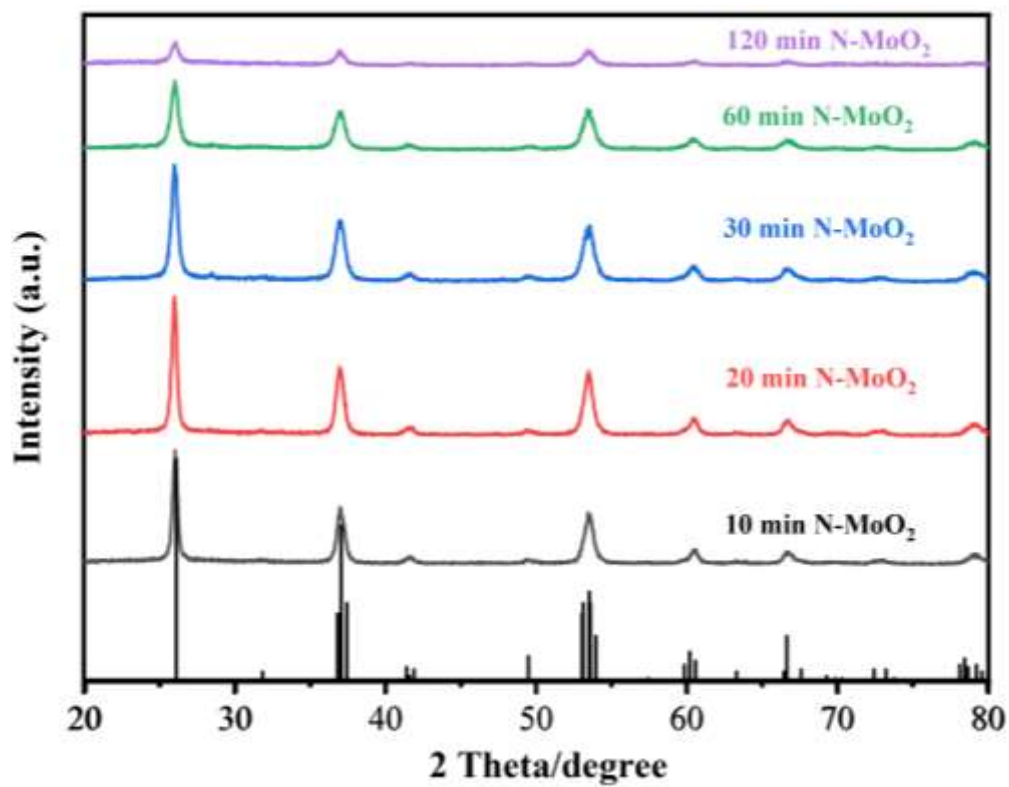

**Fig. S9** XRD patterns of the as-prepared N-MoO<sub>2</sub> catalysts with different calcination times.

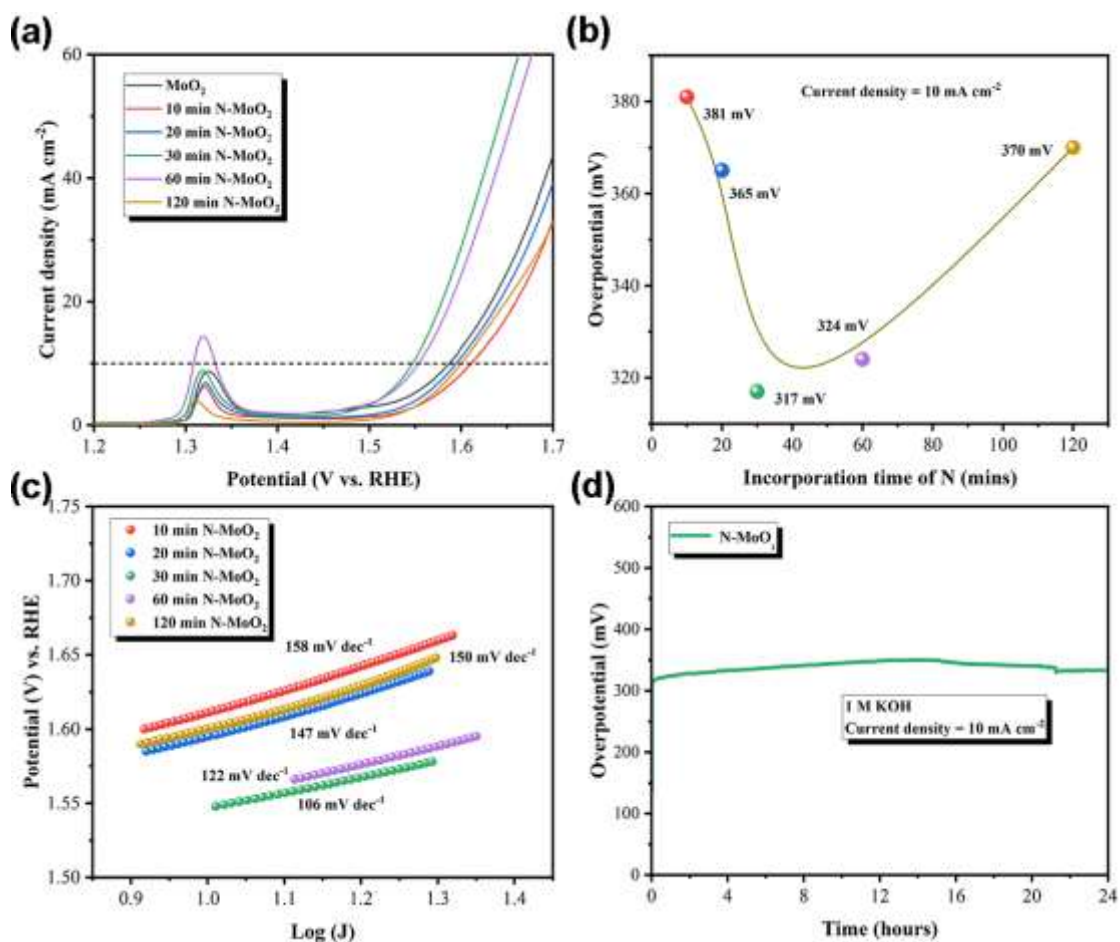

**Fig. S10** (a) Polarization curves. (b) Overpotential comparison diagram at  $10 \text{ mA cm}^{-2}$ . (c) Tafel slopes of the as-prepared N- $\text{MoO}_2$  catalysts with different calcination times. (d) Chronopotentiometric responses of N- $\text{MoO}_2$  at the current density of  $10 \text{ mA cm}^{-2}$ .

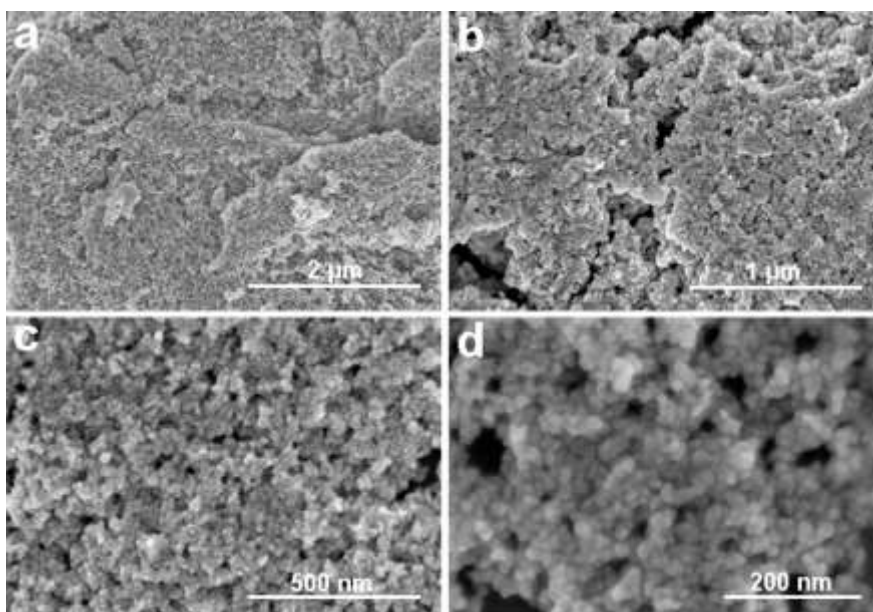

**Fig. S11** SEM images of Ni/N-MoO<sub>2</sub>.

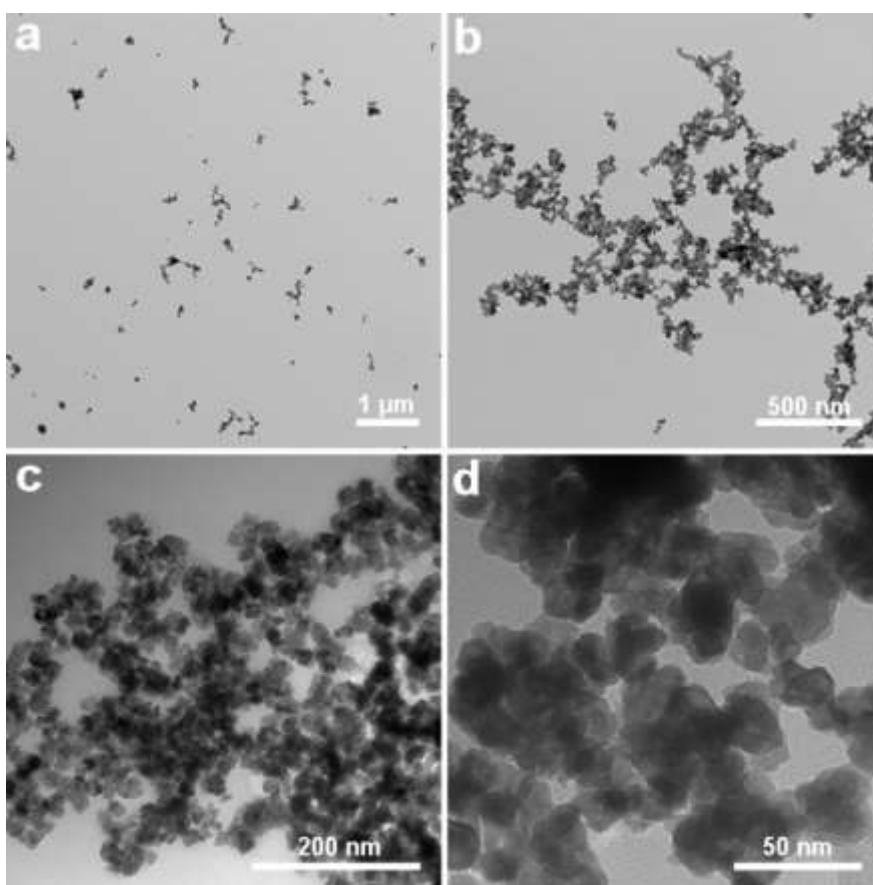

**Fig. S12** TEM images of Ni/N-MoO<sub>2</sub>.

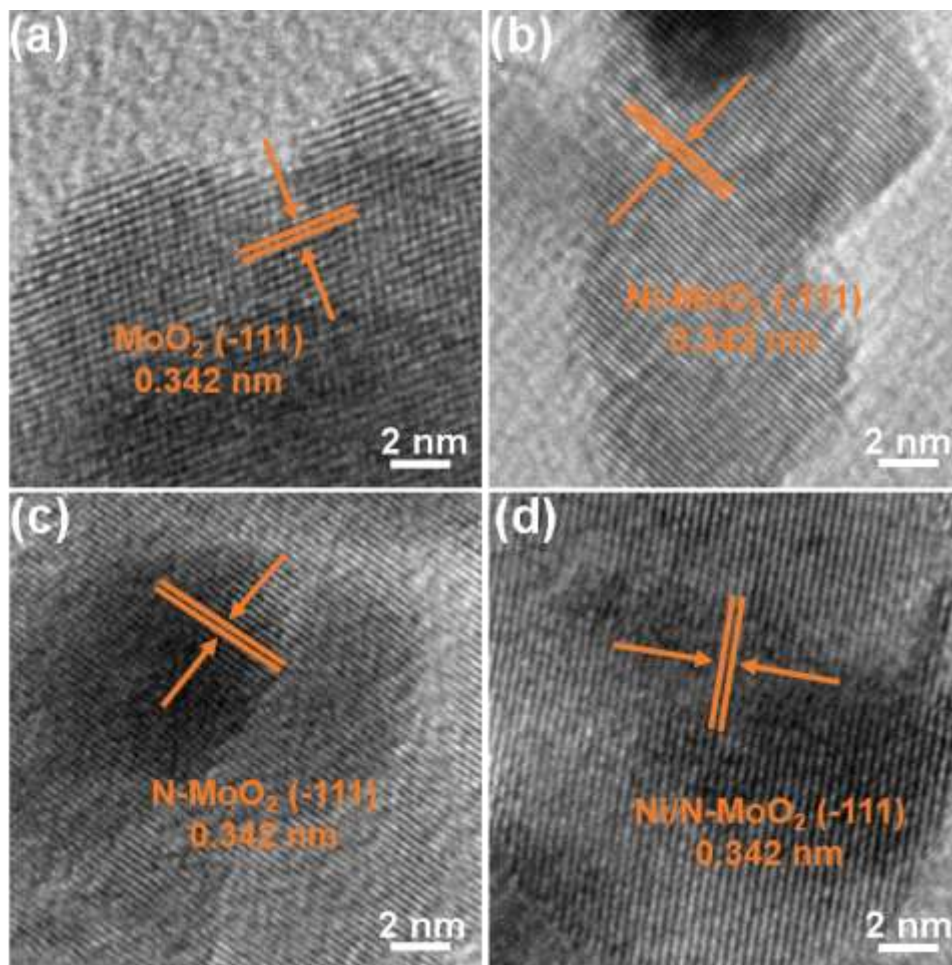

**Fig. S13** HRTEM images of (a)  $\text{MoO}_2$ , (b)  $\text{Ni-MoO}_2$ , (c)  $\text{N-MoO}_2$ , and (d)  $\text{Ni/N-MoO}_2$ .

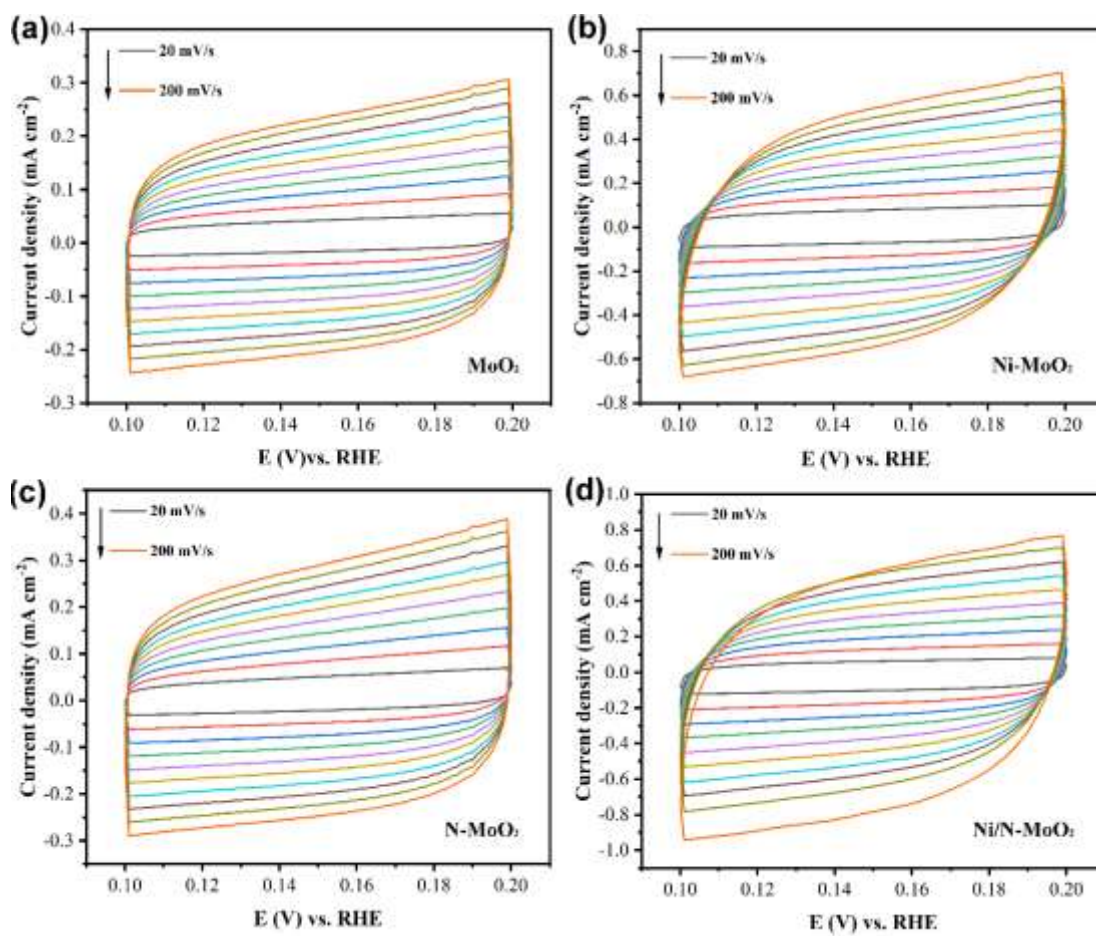

**Fig. S14** The closed CV curves of the (a) MoO<sub>2</sub>, (b) Ni-MoO<sub>2</sub>, (c) N-MoO<sub>2</sub>, and (d) Ni/N-MoO<sub>2</sub> catalysts.

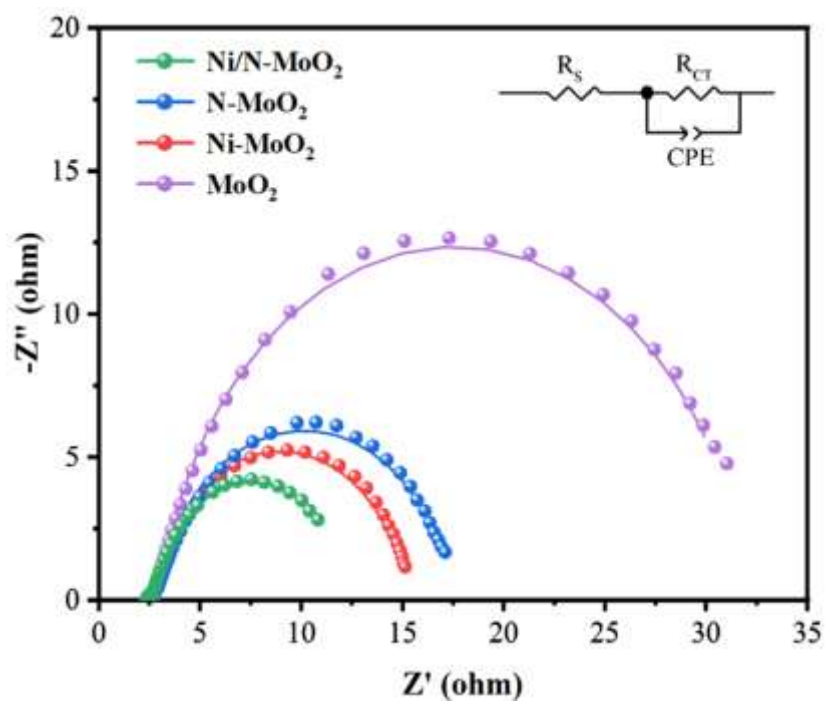

**Fig. S15** Nyquist plots of EIS of the MoO<sub>2</sub>, Ni-MoO<sub>2</sub>, N-MoO<sub>2</sub>, and Ni/N-MoO<sub>2</sub> catalysts.

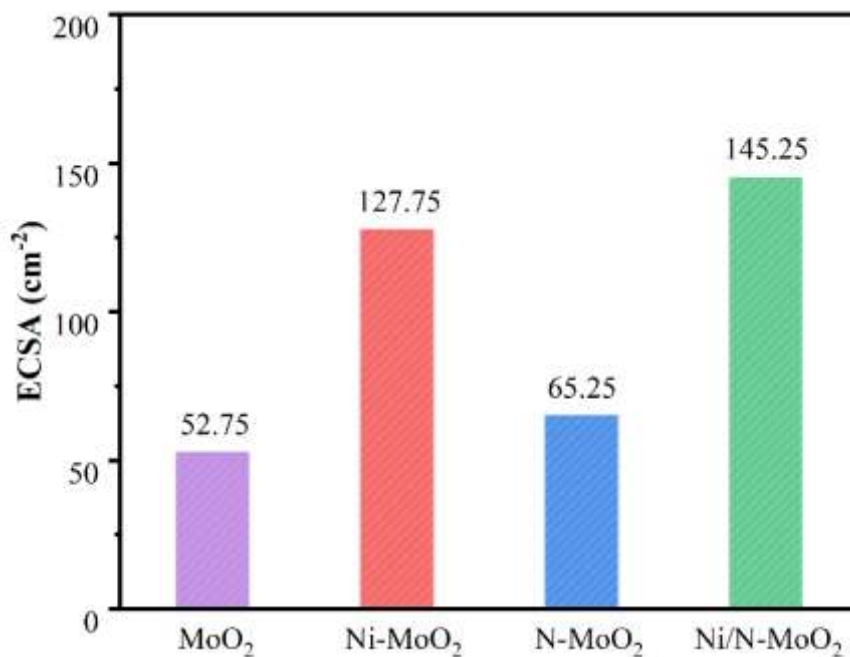

**Fig. S16** ECSA of MoO<sub>2</sub>, Ni-MoO<sub>2</sub>, N-MoO<sub>2</sub> and Ni/N-MoO<sub>2</sub> in 1.0 M KOH.



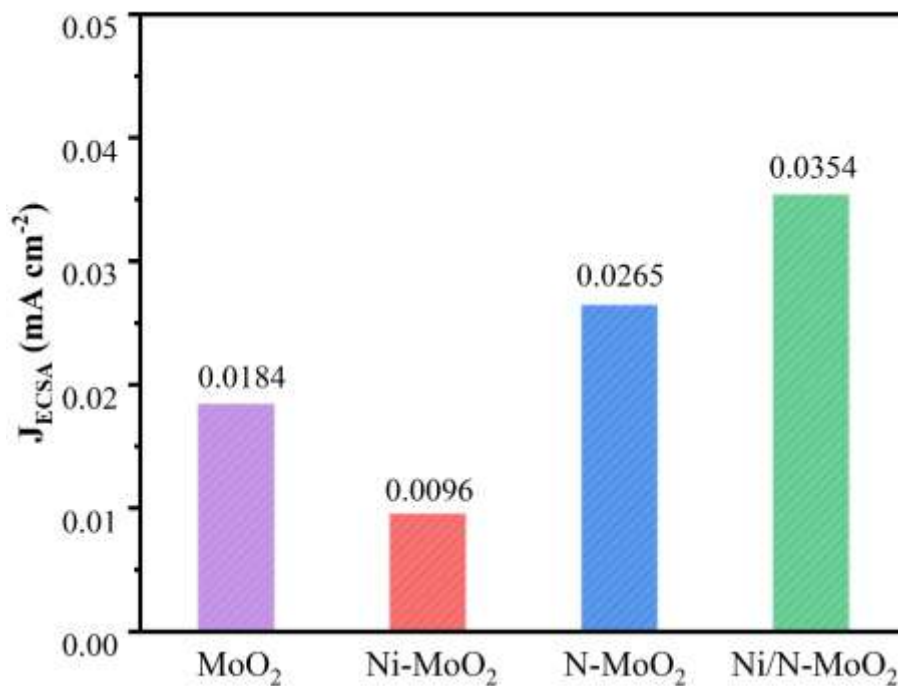

**Fig. S17** The corresponding bar graph of the ECSA-normalized current density at the overpotential of 300 mV.

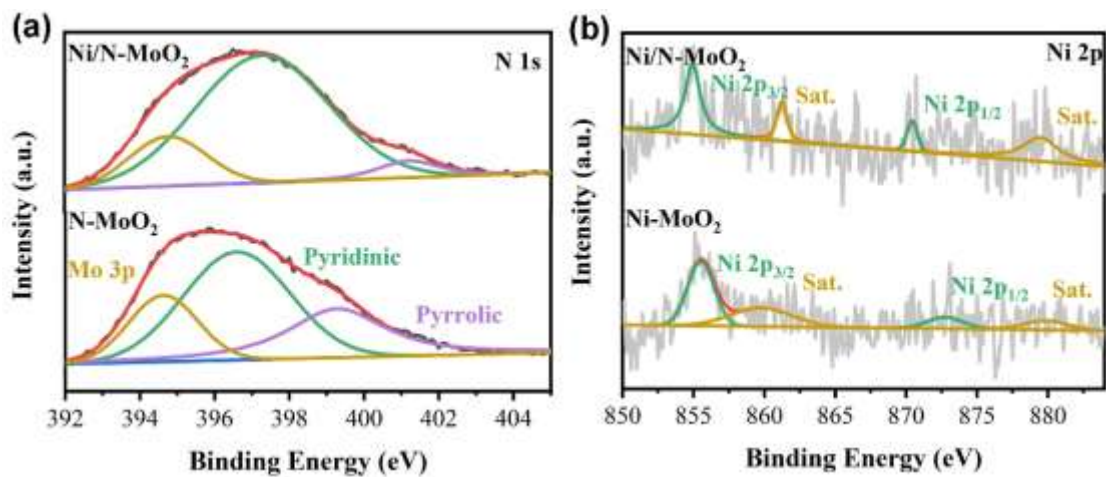

**Fig. S18** XPS spectra of (a) N 1s orbital for N-MoO<sub>2</sub> and Ni/N-MoO<sub>2</sub>. (b) Ni 2p orbital for Ni-MoO<sub>2</sub> and Ni/N-MoO<sub>2</sub>.

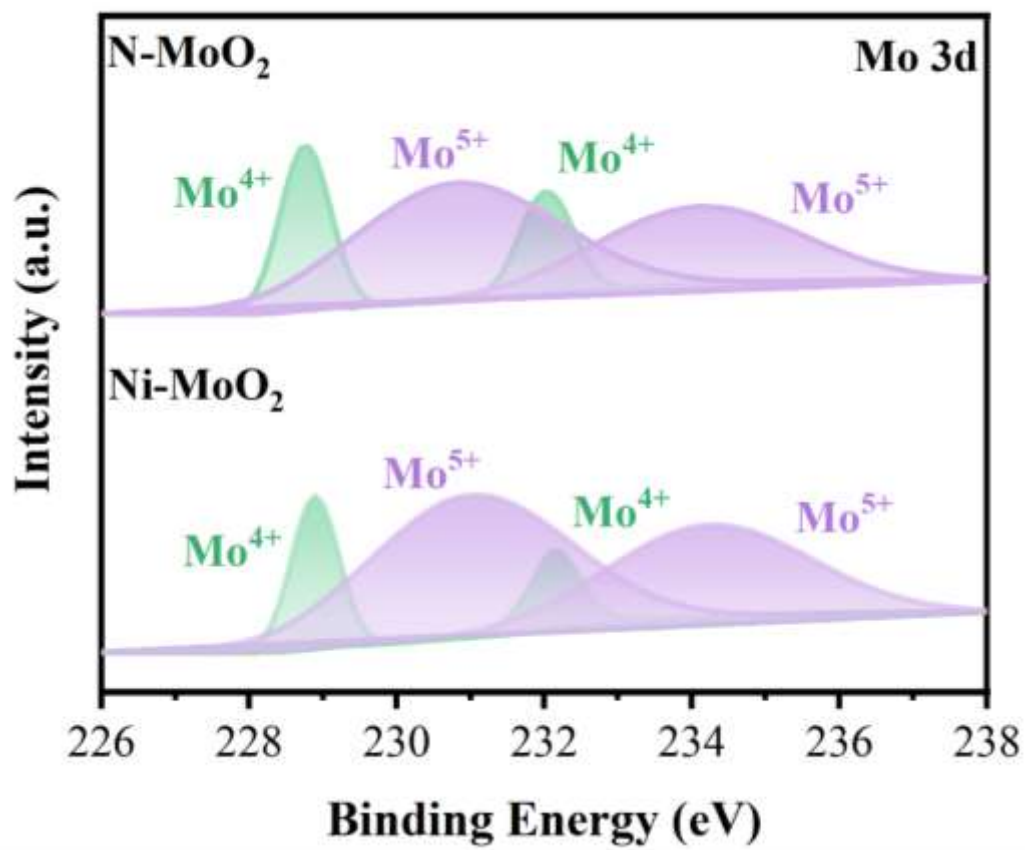

Fig. S19 Mo 3d XPS of Ni-MoO<sub>2</sub> and N-MoO<sub>2</sub>.

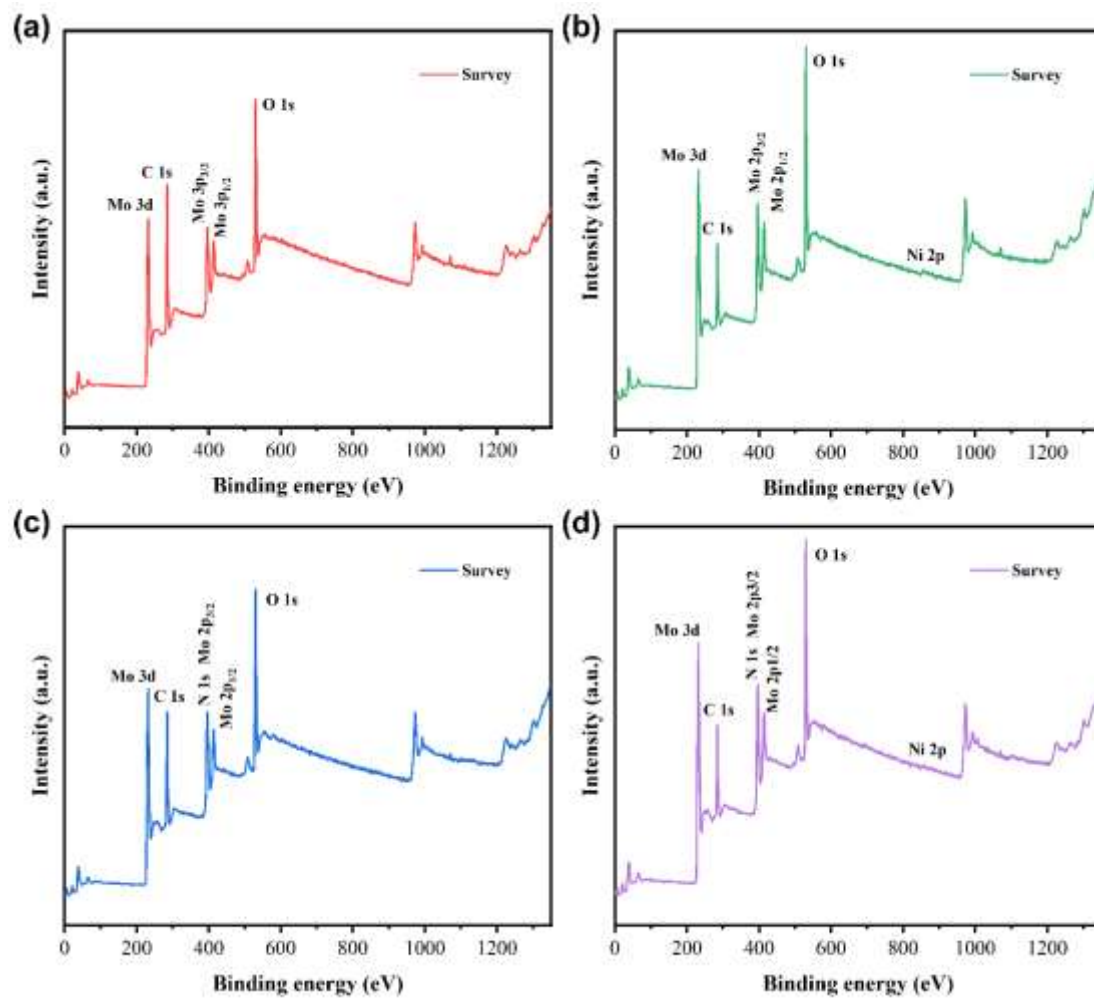

**Fig. S20** XPS survey spectra of (a) MoO<sub>2</sub>, (b) Ni-MoO<sub>2</sub>, (c) N-MoO<sub>2</sub>, and (d) Ni/N-MoO<sub>2</sub>.

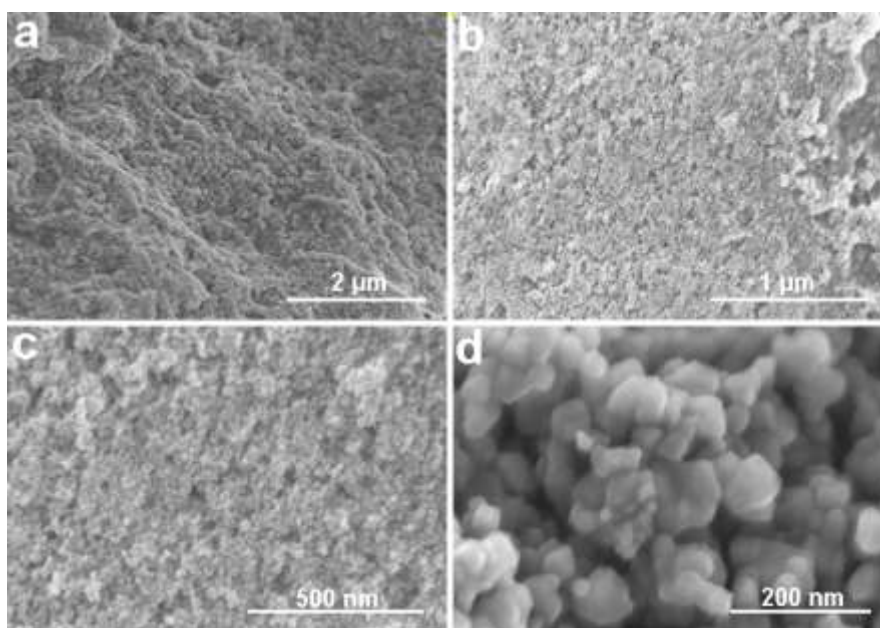

**Fig. S21** SEM images of Ni/N-MoO<sub>2</sub> after OER process.

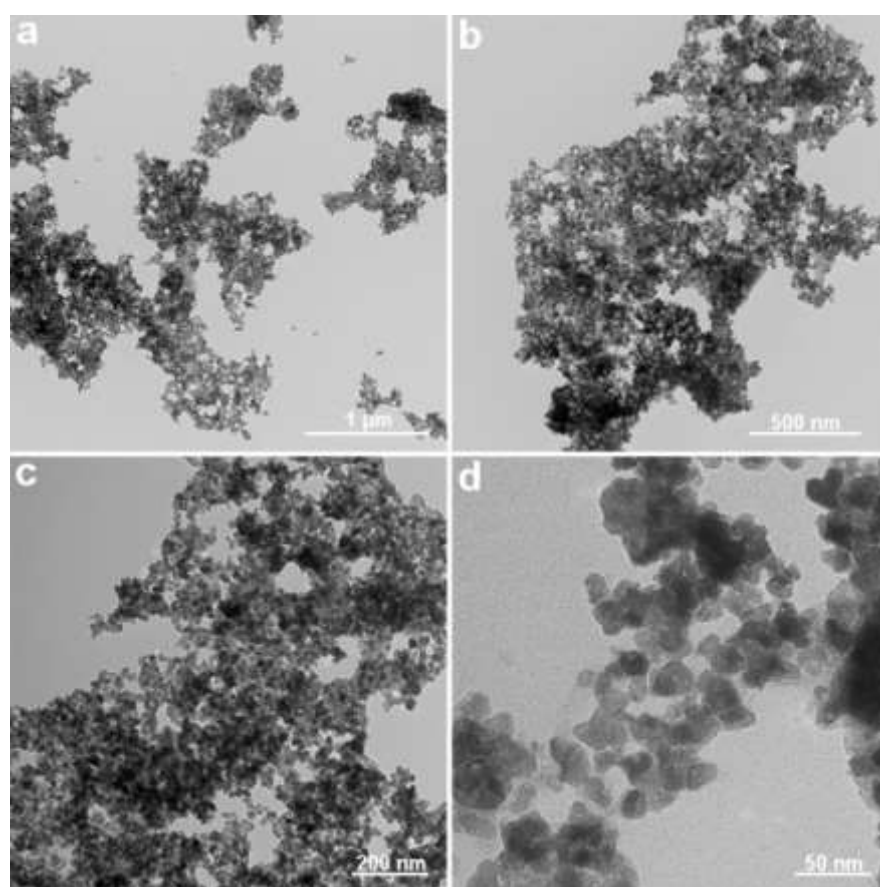

**Fig. S22** TEM images of Ni/N-MoO<sub>2</sub> after the OER process.

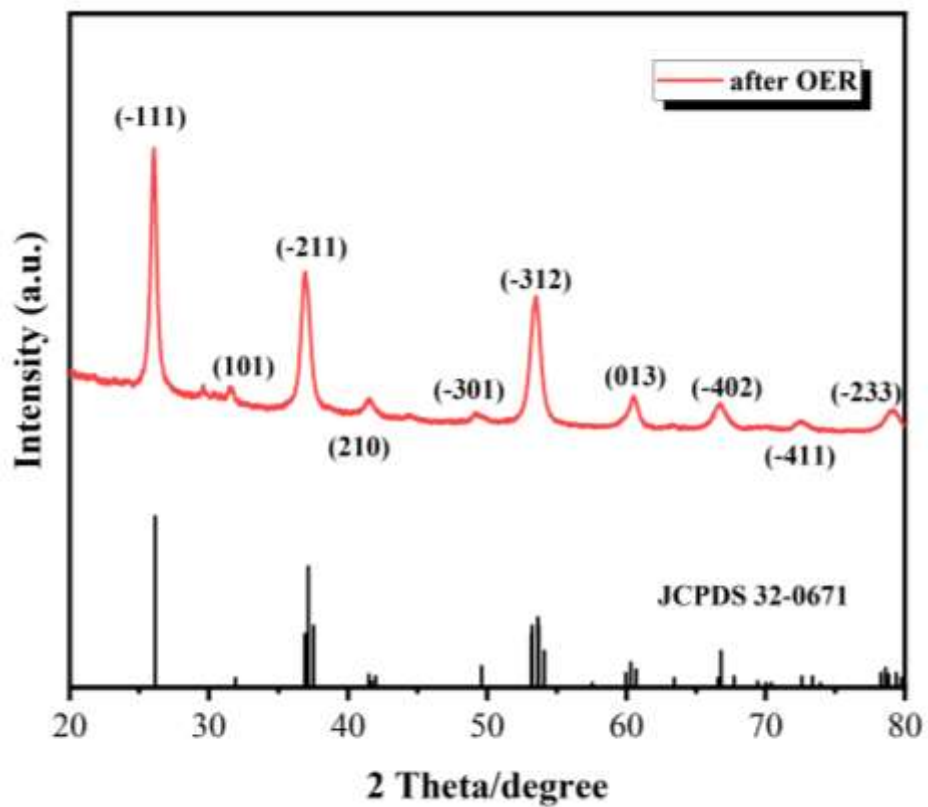

**Fig. S23** XRD patterns of Ni/N-MoO<sub>2</sub> after the OER process.

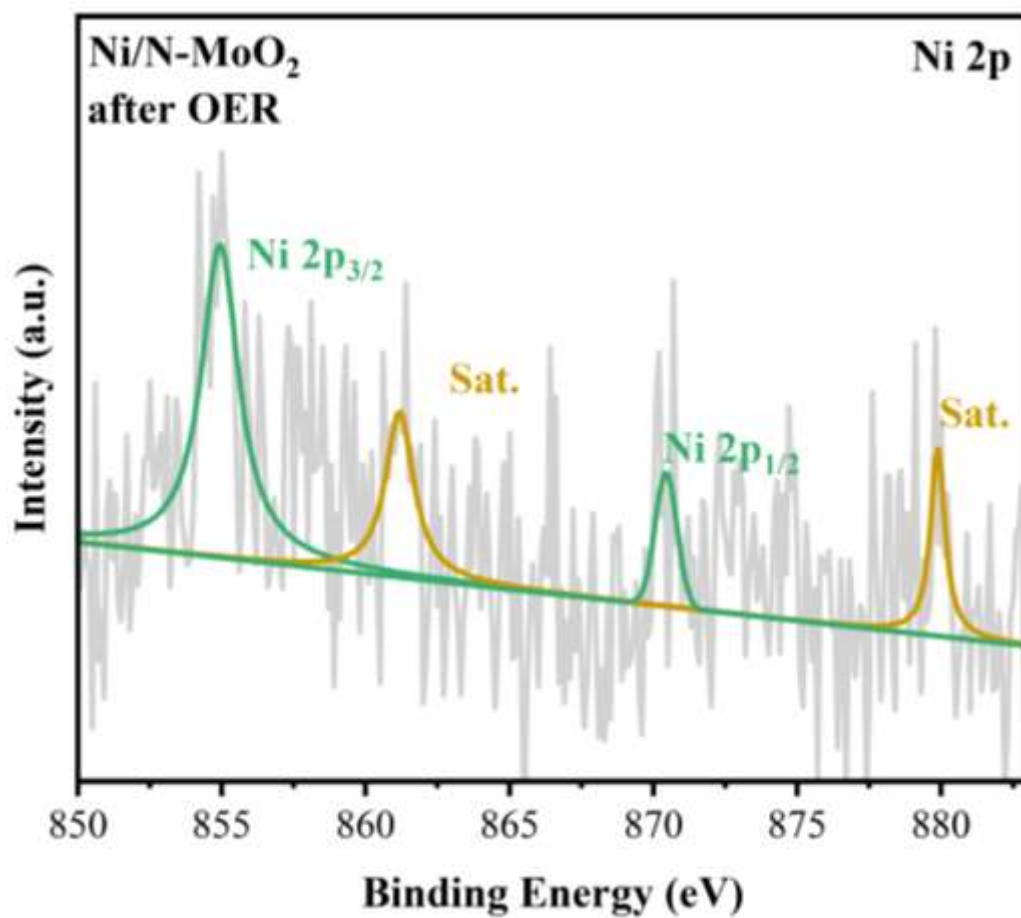

Fig. S24 The XPS spectrum of Ni 2p orbital after the OER process.

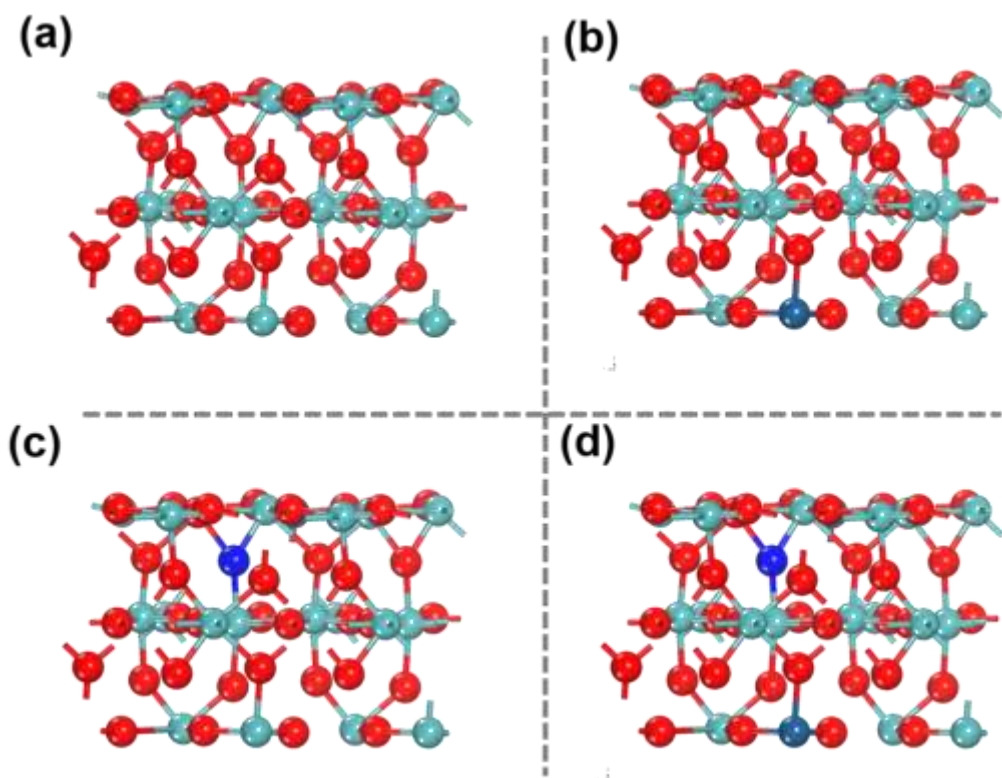

**Fig. S25** Structure models of the (a) MoO<sub>2</sub>, (b) Ni-MoO<sub>2</sub>, (c) N-MoO<sub>2</sub> and (d) Ni/N-MoO<sub>2</sub>.

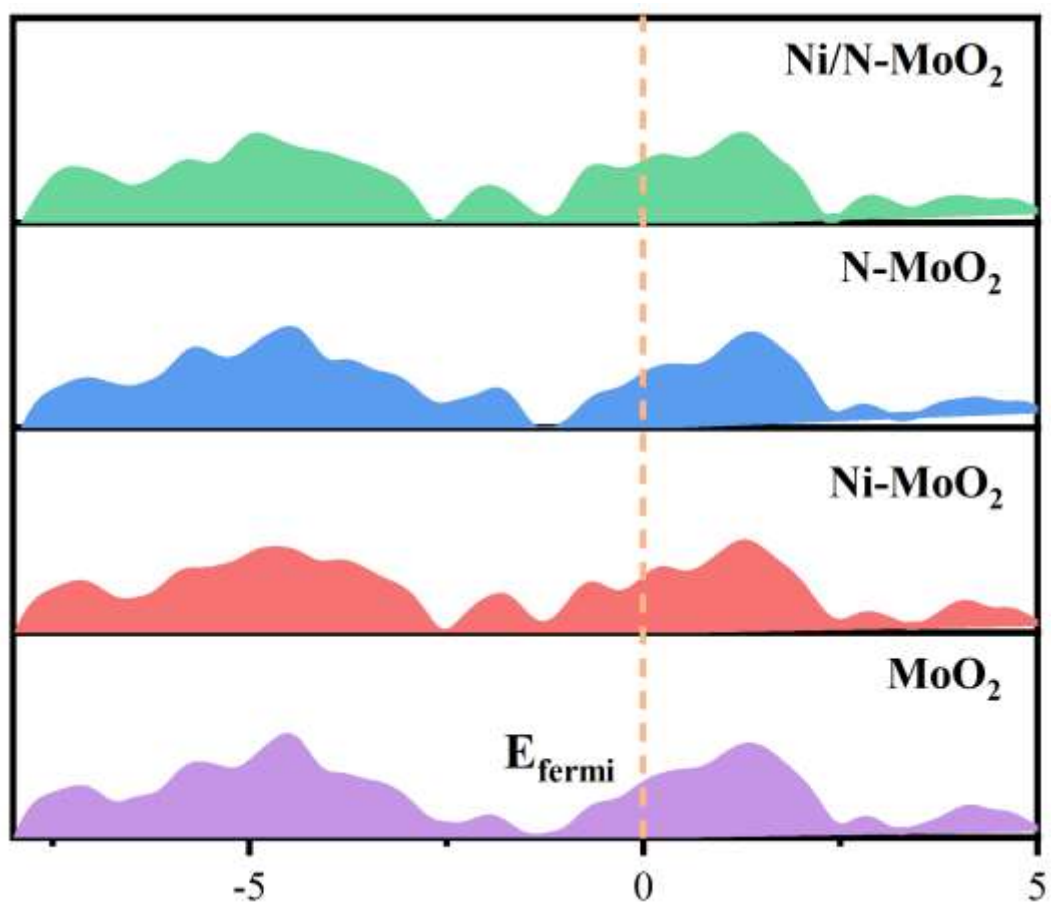

**Fig. S26** Total density of states for MoO<sub>2</sub>, Ni-MoO<sub>2</sub>, N-MoO<sub>2</sub>, Ni/N-MoO<sub>2</sub>.



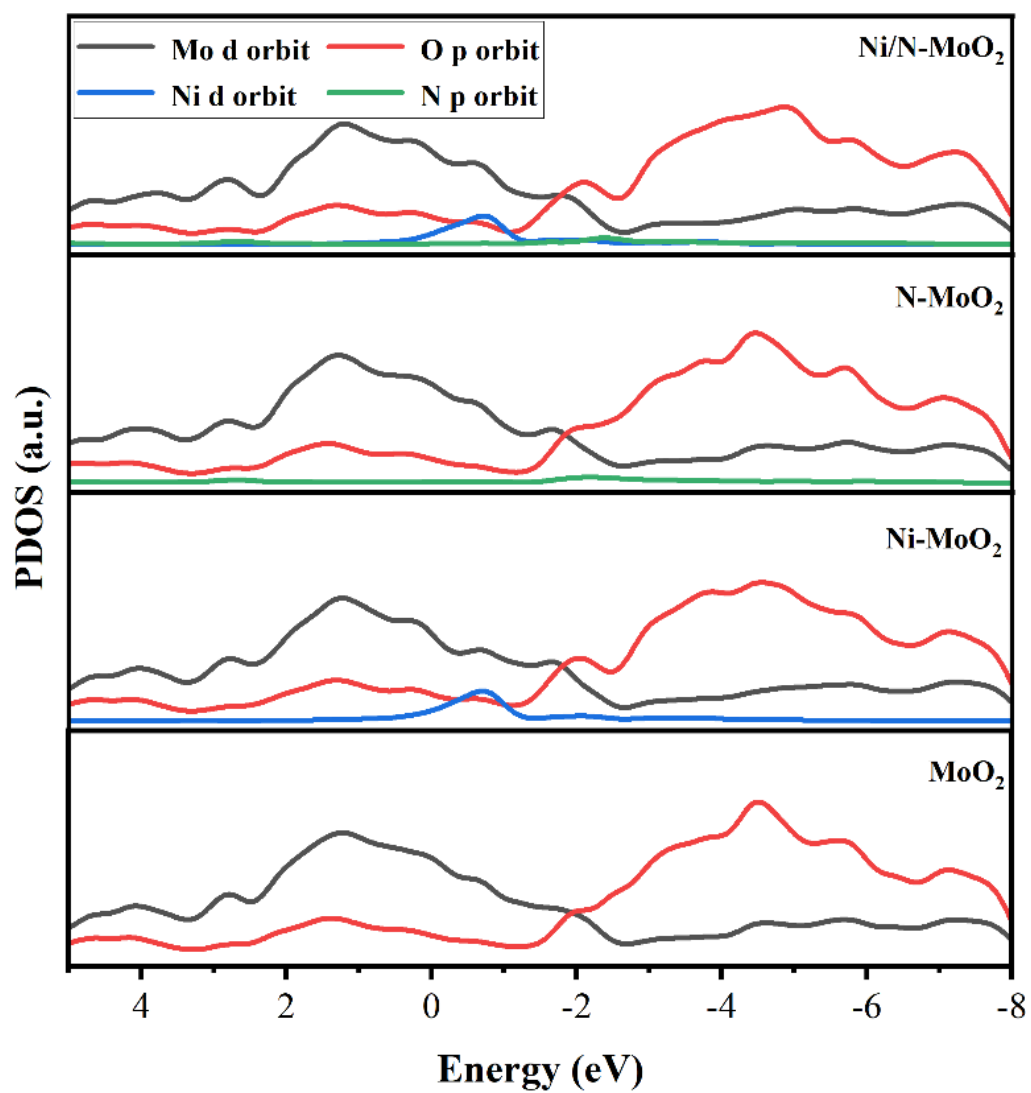

**Fig. S27** Partial electronic density of states (PDOS) of the Mo d orbit, O p orbit, Ni d orbit, and N d orbit in the MoO<sub>2</sub>, Ni-MoO<sub>2</sub>, N-MoO<sub>2</sub>, and Ni/N-MoO<sub>2</sub>.

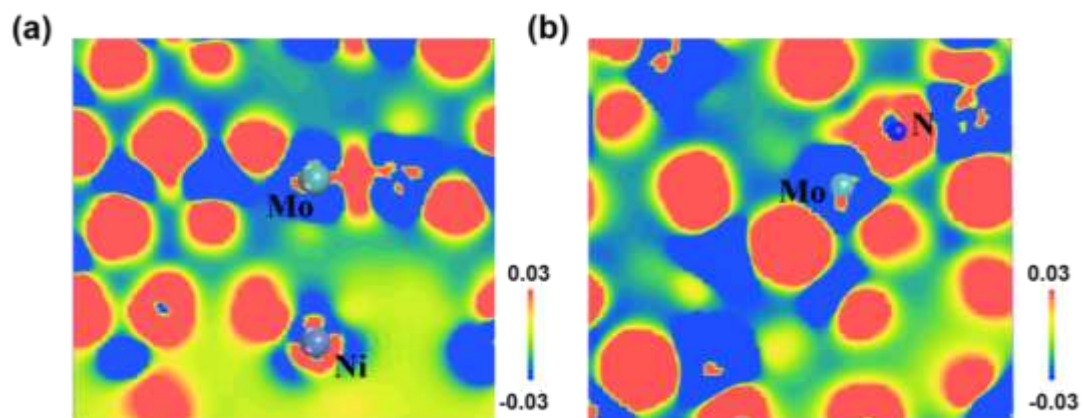

**Fig. S28** The electron density differences of (a) Ni-MoO<sub>2</sub> and (b) N-MoO<sub>2</sub>.

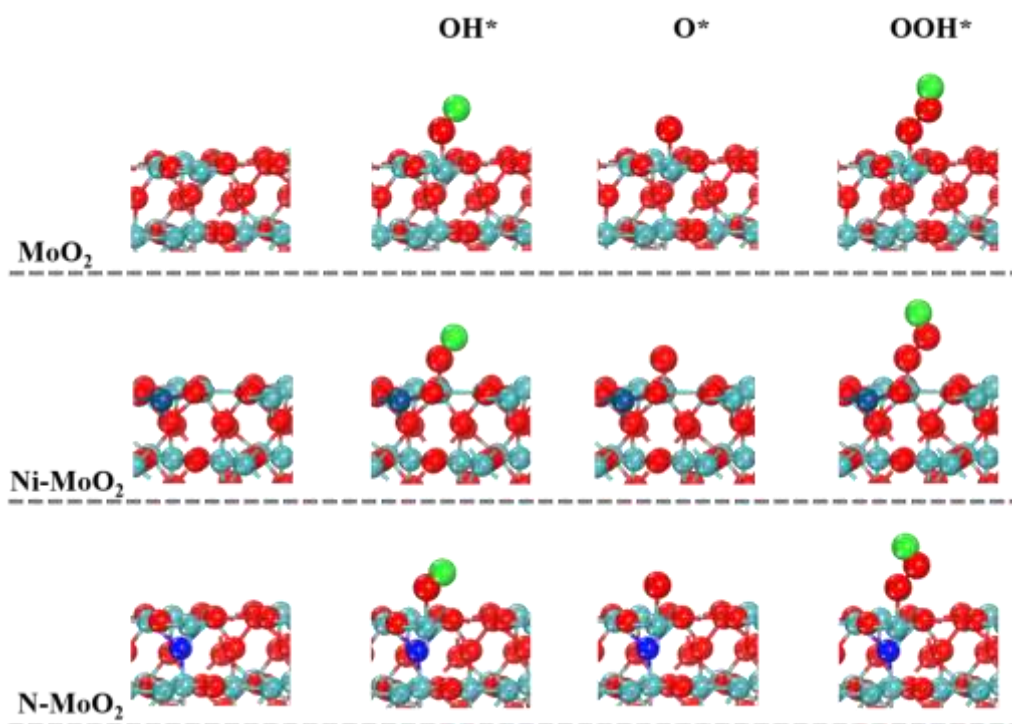

**Fig. S29** The HER process and corresponding chemisorption models of MoO<sub>2</sub>, Ni-MoO<sub>2</sub>, and N-MoO<sub>2</sub>.

**Table 1.** Summary of OER catalytic activities of representative MoO<sub>2</sub>-based catalysts in alkaline electrolyte.

| <b>Catalysts</b>                                                     | <b>Electrolyte</b> | <b><math>\eta_{10}</math> (mV)</b> | <b>Ref.</b> |
|----------------------------------------------------------------------|--------------------|------------------------------------|-------------|
| Ni/N-MoO <sub>2</sub>                                                | 1.0 M KOH          | 270                                | This work   |
| MoO <sub>2</sub> @3DC                                                | 1.0 M KOH          | 348                                | [1]         |
| MoO <sub>2</sub> /NF                                                 | 1.0 M KOH          | 340                                | [2]         |
| MoO <sub>2</sub> nanosheet                                           | 1.0 M KOH          | 300                                | [3]         |
| Ni/MoO <sub>2</sub>                                                  | 1.0 M KOH          | 287                                | [4]         |
| MoO <sub>2</sub> -Co <sub>2</sub> Mo <sub>3</sub> O <sub>8</sub>     | 1.0 M KOH          | 320                                | [5]         |
| CMO@NC                                                               | 1.0 M KOH          | 272                                | [6]         |
| MoO <sub>2</sub> @NC                                                 | 1.0 M KOH          | 302                                | [7]         |
| MoO <sub>2-x</sub> +OH <sup>-</sup>                                  | 1.0 M KOH          | 296                                | [8]         |
| CoO-MoO <sub>2</sub>                                                 | 1.0 M KOH          | 312                                | [9]         |
| MoO <sub>2</sub> /CoC <sub>2</sub> O <sub>4</sub> ·2H <sub>2</sub> O | 1.0 M KOH          | 330                                | [10]        |
| MoO <sub>2</sub> @MoS <sub>2</sub> @Co <sub>9</sub> S <sub>8</sub>   | 1.0 M KOH          | 310                                | [11]        |
| Ni-MoO <sub>2</sub> @SCG                                             | 1.0 M KOH          | 278                                | [12]        |
| NiMoO <sub>4-x</sub> /MoO <sub>2</sub>                               | 1.0 M KOH          | 233                                | [13]        |
| Fe <sub>2</sub> O <sub>3</sub> /NiO/MoO <sub>2</sub>                 | 1.0 M KOH          | 282                                | [14]        |
| MCF/NPCCNT                                                           | 1.0 M KOH          | 292                                | [15]        |
| MoO <sub>2</sub> -Co <sub>2</sub> Mo <sub>3</sub> O <sub>8</sub> @C  | 1.0 M KOH          | 320                                | [16]        |
| Co/MoO <sub>2</sub>                                                  | 1.0 M KOH          | 318                                | [17]        |
| MoO <sub>2</sub> /Ni <sub>0.2</sub> Mo <sub>0.8</sub> N              | 1.0 M KOH          | 264                                | [18]        |
| MoO <sub>2</sub> @MoS <sub>2</sub> @Co <sub>9</sub> S <sub>8</sub>   | 1.0 M KOH          | 310                                | [19]        |
| Ni <sub>3</sub> Mo <sub>3</sub> N-MoO <sub>2</sub> -NiO              | 1.0 M KOH          | 363                                | [20]        |

## References

1. W. Zhu, X. H. Yan, X. P. Huang, S. T. Wu, H. Chen, J. M. Pan, T. Li and Z. Shahnavaaz, *Ceram. Int.* 2023, **49**, 5646-5656.
2. H. Y. Wang, J. T. Ren, C. C. Weng, X. W. Lv and Z. Y. Yuan, *Chem. Eng. J.* 2021, **426**, 130761.
3. Y. S. Jin, H. T. Wang, J. J. Li, X. Yue, Y. J. Han, P. K. Shen and Y. Cui, *Adv. Mater.* 2016, **28**, 3785-3790.
4. S. Ni, H. N. Qu, H. F. Xing, Z. H. Xu, X. Y. Zhu, M. L. Yuan, L. Wang, J. M. Yu, Y. Q. Li, L. R. Yang and H. Z. Liu, *ACS Appl. Mater. Interfaces*, 2021, **13**, 17501-17510.
5. Y. Q. Li, H. B. Xu, H. Y. Huang, C. Wang, L. G. Gao and T. L. Ma, *Chem. Commun.* 2018, **54**, 2739-2742.
6. W. Yaseen, M. Xie, B. A. Yusuf, Y. G. Xu, M. Rafiq, N. Ullah, P. Y. Zhou, X. Li and J. M. Xie, *Int. J. Hydrogen Energ.* 2022, **47**, 15673-15686.
7. M. L. Mei, X. X. Xu, Y. Wang, X. J. Wang and Y. Q. Huo, *J. Name.* 2013, **00**, 1-3.
8. P. Guha, B. Mohanty, R. Thapa, R. M. Kadam, P. V. Satyam and B. K. Jena, *ACS Appl. Energy Mater.* 2020, **3**, 5208-5218.
9. F. L. Lyu, Y. C. Bai, Z. W. Li, W. J. Xu, Q. F. Wang, J. Mao, L. Wang, X. W. Zhang, and Y. D. Yin, *Adv. Funct. Mater.* 2017, **27**, 1702324.
10. S. Ghosh, H. R. Inta, S. Ganguli, G. Tudu, H. V. S. R. M. Koppiseti and V. Mahalingam, *J. Phys. Chem. C.* 2020, **124**, 20010-20020.

11. Y. Q. Li, C. Wang, M. Cui, J. B. Xiong, L. W. Mi, S. Chen, *Appl. Surf. Sci.* 2021, **543**, 148804.
12. T. Zhou, Y. Q. Huang, A. Ali, P. K. Shen, *J. Electroanal. Chem.* 2021, **897**, 115555.
13. Z. Zhang, X. X. Ma, and J. L. Tang, *J. Mater. Chem. A*. 2018, **6**, 12361-12369.
14. X. J. Zhang, Y. F. Chen, M. L. Chen, B. Wang, B. Yu, X. Q. Wang, W. L. Zhang, D. G. Yang, *Nanoscale*, 2020, **12**, 3777-3786.
15. X. J. Zhang, Y. F. Chen, M. L. Chen, B. Yu, B. Wang, X. Q. Wang, W. L. Zhang, D. X. Yang, *J. Colloid. Interf. Sci*, 2021, **581**, 608-618.
16. Y. Q. Li, H. B. Xu, H. Y. Huang, C. Wang, L. G. Gao, T. L. Ma, *Chem. Commun*, 2018, **54**, 2739-2742.
17. L. Xia, Y. J. Li, H. Song, X. X. Li, W. J. Gong, X. Y. Jiang, M. Javanbakht, X. M. Zhang, B. Gao, P. K. Chu, *Rsc. Adv*, 2022, **12**, 34760-34765.
18. Y. W. Hu, H. Yang, J. Chen, *New. J. Chem*, 2023, **47**, 10916-10920.
19. Y. Q. Li, C. Wang, M. Cui, J. B. Xiong, L. W. Mi, S. R. Chen, *Appl. Surf. Sci*, 2021, **543**, 148804.
20. B. Peng, J. Hao, Z. M. Tian, Q. C. Xu, C. X. Ma, G. Y. Liu, Y. Y. Shi, W. J. Zheng, *Energ. Fuel*, 2022, **36**, 4902-4910
